# Supplementary material for: Insights into the development and performance of CuO/CuFe2SxO4−x catalysts: an effective approach for renewable hydrogen generation
Source: Royal Society of Chemistry journal article supplement (doi:10.1039/d3ma01137b), 2024-01-01
Supplement: d3ma01137b1.pdf [file d3ma01137b1.pdf]

## Supporting Information

### **Insights into the development and proceeding of $\text{CuO/CuFe}_2\text{S}_x\text{O}_{4-x}$ catalysts: An effective approach for hydrogen generation**

Ejaz Hussain<sup>a\*</sup>, Muhammad Jalil<sup>a</sup>, Muhammad Zeeshan Abid<sup>a</sup>, Javeria Mansab<sup>a</sup>, Raed H. Althomali<sup>b</sup>, Shuxin Wang<sup>c</sup>, Abdul Rauf<sup>a</sup>, Khezina Rafiq<sup>a\*</sup>

<sup>a</sup>Institute of Chemistry, Inorganic Materials Laboratory 52S, The Islamia University of Bahawalpur–63100, Pakistan

<sup>b</sup>Department of Chemistry, College of Arts and Science, Prince Sattam Bin Abdulaziz University, Wadi Al-Dawasir–11991, Saudi Arabia.

<sup>c</sup>College of Materials Science and Engineering, Qingdao University of Science and Technology, Qingdao–266042, P.R. China

Corresponding authors email: [ejaz.hussain@iub.edu.pk](mailto:ejaz.hussain@iub.edu.pk)

[khezina.rafiq@iub.edu.pk](mailto:khezina.rafiq@iub.edu.pk)

**Table S1:** Chemical composition and atomic percentages of  $\text{CuFe}_2\text{O}_4$  determined using energy-dispersive X-ray (EDX) analysis.

| <b>Elements</b> | <b>Weight %</b> | <b>At %</b> |
|-----------------|-----------------|-------------|
| C               | 0.66            | 1.68        |
| O               | 25.28           | 54.75       |
| Fe              | 47.92           | 28.56       |
| Cu              | 26.14           | 15.01       |
| Totals          | 100             | 100         |

**Table S2:** Energy-Dispersive X-ray (EDX) analysis was used to estimate the elemental weight and atomic percentages in the as-prepared  $\text{CuO}/\text{CuFe}_2\text{S}_x\text{O}_{4-x}$ .

| <b>Elements</b> | <b>Weight %</b> | <b>At %</b> |
|-----------------|-----------------|-------------|
| C               | 0.61            | 1.66        |
| O               | 25.88           | 56.74       |
| S               | 2.2             | 1.24        |
| Fe              | 47.95           | 29.12       |
| Cu              | 23.36           | 11.24       |
| Totals          | 100             | 100         |

**Table S3:** Magnetic parameters Magnetic saturation, Residual magnetic intensity, Coercivity and Squareness ratio of as-synthesized catalysts.

| <b>Magnetic Parameters</b>               | <b>CuFe<sub>2</sub>O<sub>4</sub></b> | <b>CuO/CuFe<sub>2</sub>O<sub>4</sub></b> | <b>CuO/CuFe<sub>2</sub>S<sub>x</sub>O<sub>4-x</sub></b> |
|------------------------------------------|--------------------------------------|------------------------------------------|---------------------------------------------------------|
| Magnetic saturation (MS) (emu/g)         | 21.4                                 | 40.7                                     | 31.6                                                    |
| Residual magnetic intensity (Mr) (emu/g) | 4.5                                  | 10.1                                     | 7.04                                                    |
| Coercivity (Hc) (G)                      | 218                                  | 346                                      | 294                                                     |
| Squareness ratio                         | 0.021                                | 0.029                                    | 0.023                                                   |

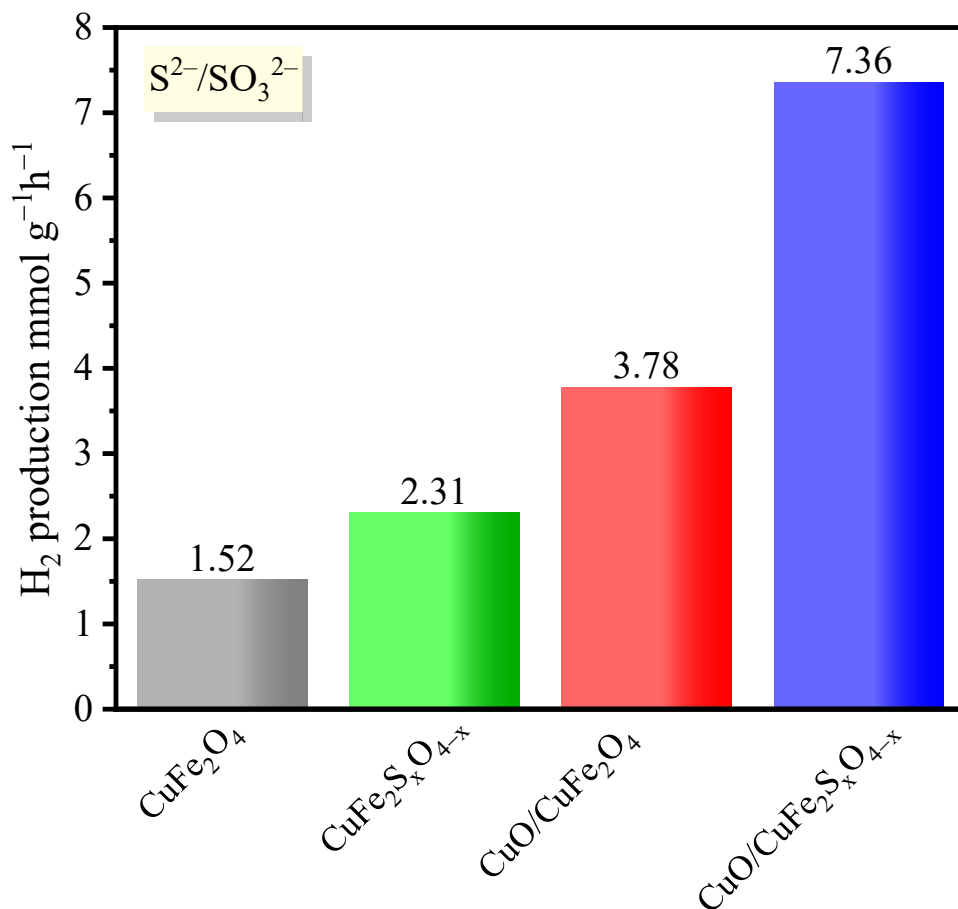

**Figure S1:** Photocatalytic H<sub>2</sub> evolution of CuFe<sub>2</sub>O<sub>4</sub>, CuFe<sub>2</sub>S<sub>x</sub>O<sub>4-x</sub>, CuO/CuFe<sub>2</sub>O<sub>4</sub> and CuO/CuFe<sub>2</sub>S<sub>x</sub>O<sub>4-x</sub> photocatalysts in the presence of S<sup>2-</sup>/SO<sub>3</sub><sup>2-</sup> sacrificial reagents.

The suggested reaction mechanism for the photocatalytic H<sub>2</sub> evolution in the presence of S<sup>2-</sup>/SO<sub>3</sub><sup>2-</sup> mixtures is given in equation S1-S6<sup>1</sup>,

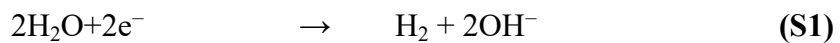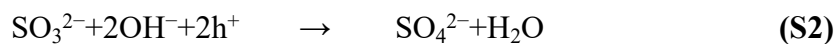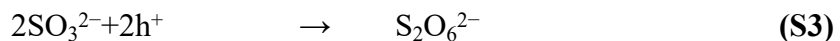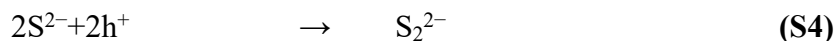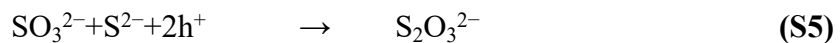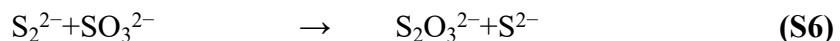

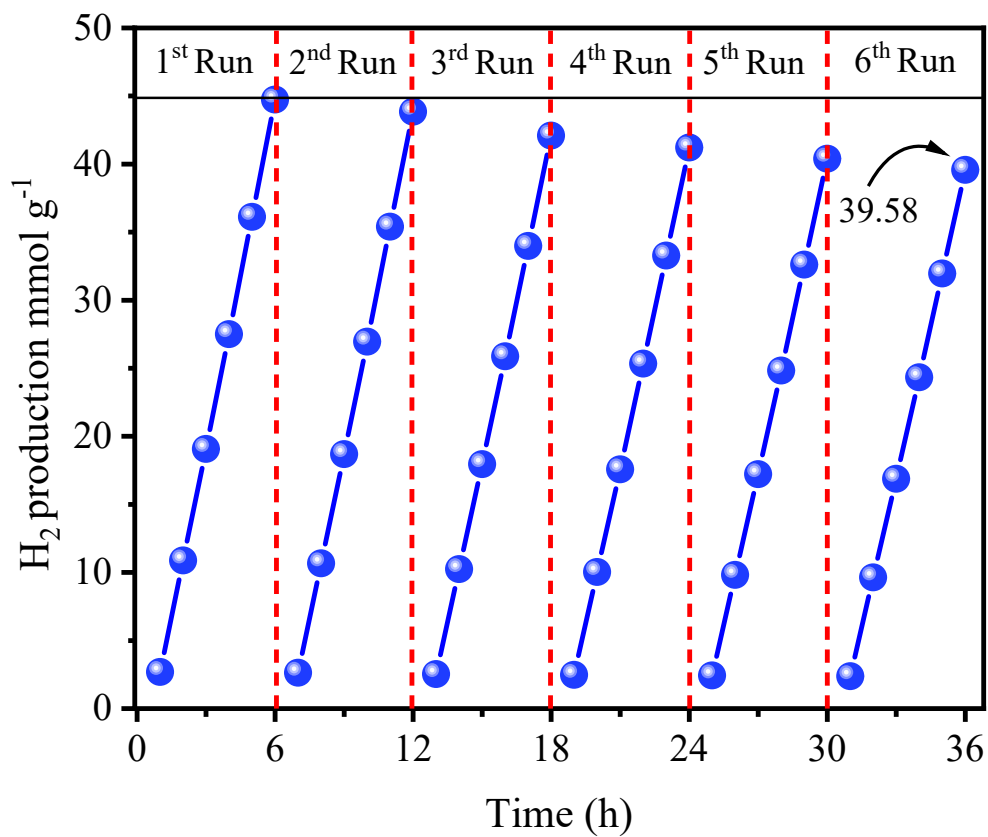

**Figure S2:** Recyclability test of catalysts.

## References:

1. J. Schneider and D. W. Bahnemann, *The Journal of Physical Chemistry Letters*, 2013, **4**, 3479-3483.
